# Supplementary material for: Electrospun α-Fe2O3 nanostructures for supercapacitor applications
Source: Royal Society of Chemistry journal article supplement (doi:10.1039/c3ta12352a), 2013-01-01
Supplement: c3ta12352a.pdf [file c3ta12352a.pdf]

## Electronic Supplementary Information (ESI)

### Electrospun $\alpha$ -Fe<sub>2</sub>O<sub>3</sub> Nanostructures for Supercapacitor Applications

G. Binitha,<sup>a</sup> M. S. Soumya,<sup>a</sup> Asha Anish Madhavan,<sup>a</sup> P. Praveen,<sup>a</sup> A. Balakrishnan,<sup>a</sup> K. R. V. Subramanian,<sup>a</sup> M. V.Reddy,<sup>b</sup> Shantikumar V. Nair,<sup>a</sup> A. Sreekumaran Nair,<sup>a,\*</sup> and N. Sivakumar<sup>a,\*</sup>

<sup>a</sup>*Nanosolar Division, Amrita Centre for Nanoscience and Molecular Medicine, Ponekkara, Kochi, India.*

*Email: [nsivakumar@amrita.edu.sg](mailto:nsivakumar@amrita.edu.sg) (N. Sivakumar); [sreekumarannair@aims.amrita.edu](mailto:sreekumarannair@aims.amrita.edu) (A. Sreekumaran Nair)*

*Fax: +91-484-2802020; Tel: +91-484-2802020*

<sup>b</sup>*Department of Physics, National University of Singapore, Singapore 117542.*

## ESI 1

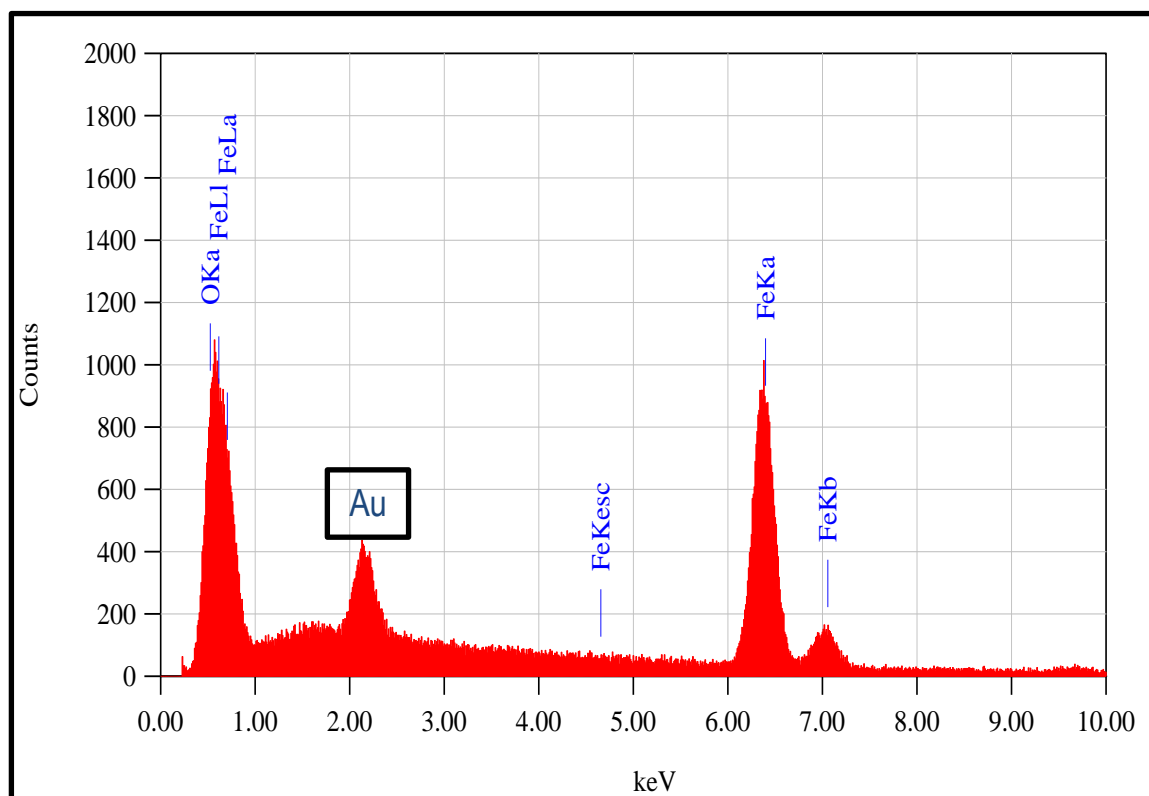

EDX spectra of  $\alpha$ -Fe<sub>2</sub>O<sub>3</sub> PF.

## ESI 2

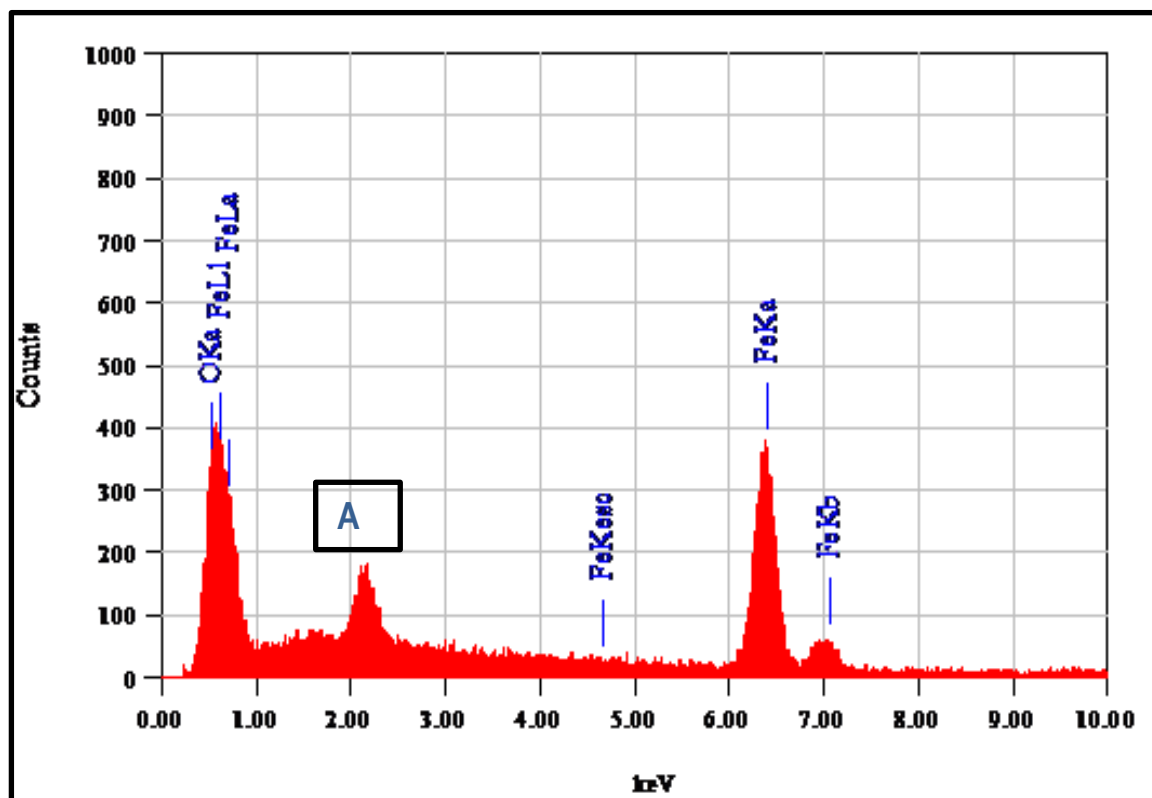

EDX spectra of  $\alpha$ -Fe<sub>2</sub>O<sub>3</sub> NG.

**ESI 3**

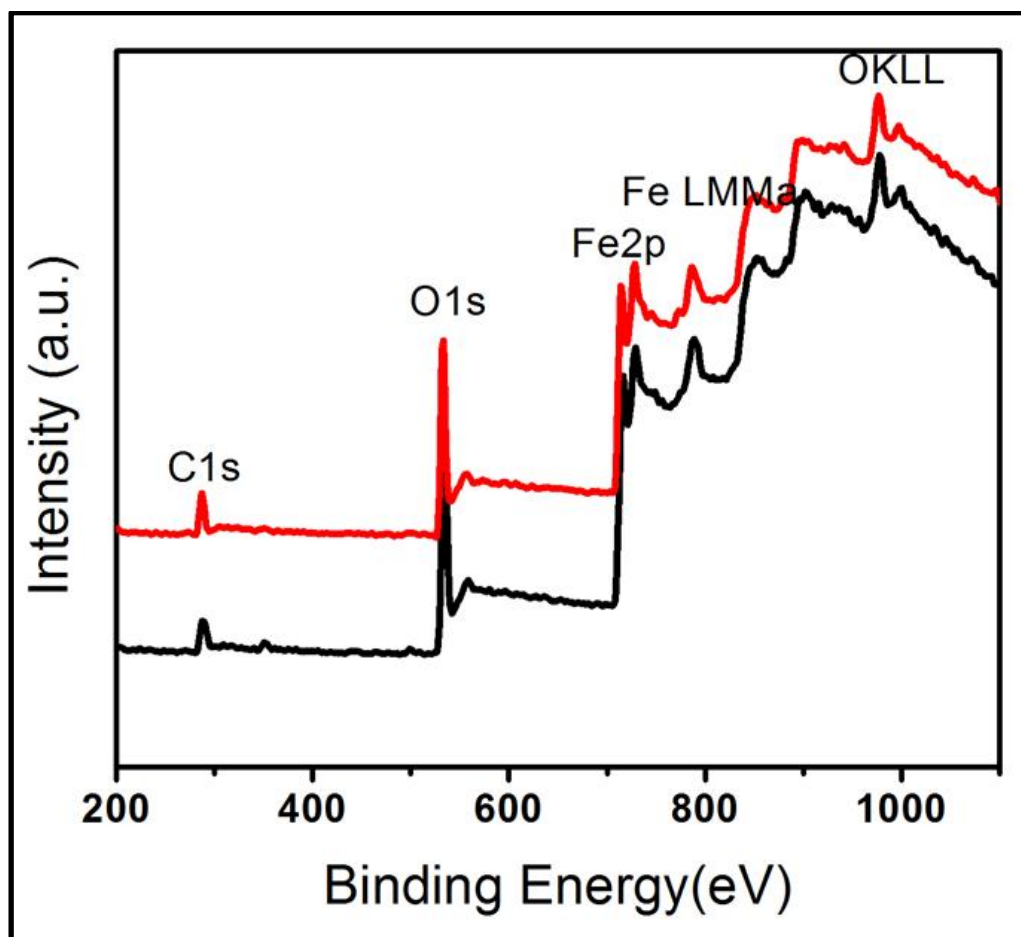

XPS spectrum (wide) of the  $\alpha$ -Fe<sub>2</sub>O<sub>3</sub> PFs (black) and NGs (red) nanostructures showing the elemental composition. The spectrum also indicates the presence of a small amount of adventitious C1s feature.

## ESI 4

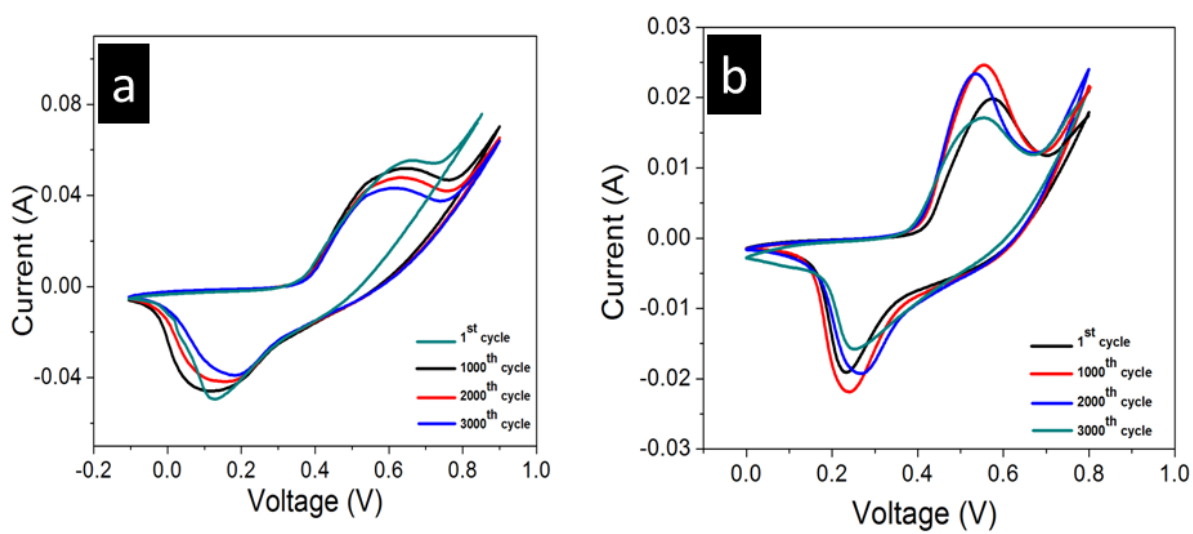

CV curves of PF electrode at different cycle number (a). CV curves of NG electrode at different cycle number (b).

## ESI 5

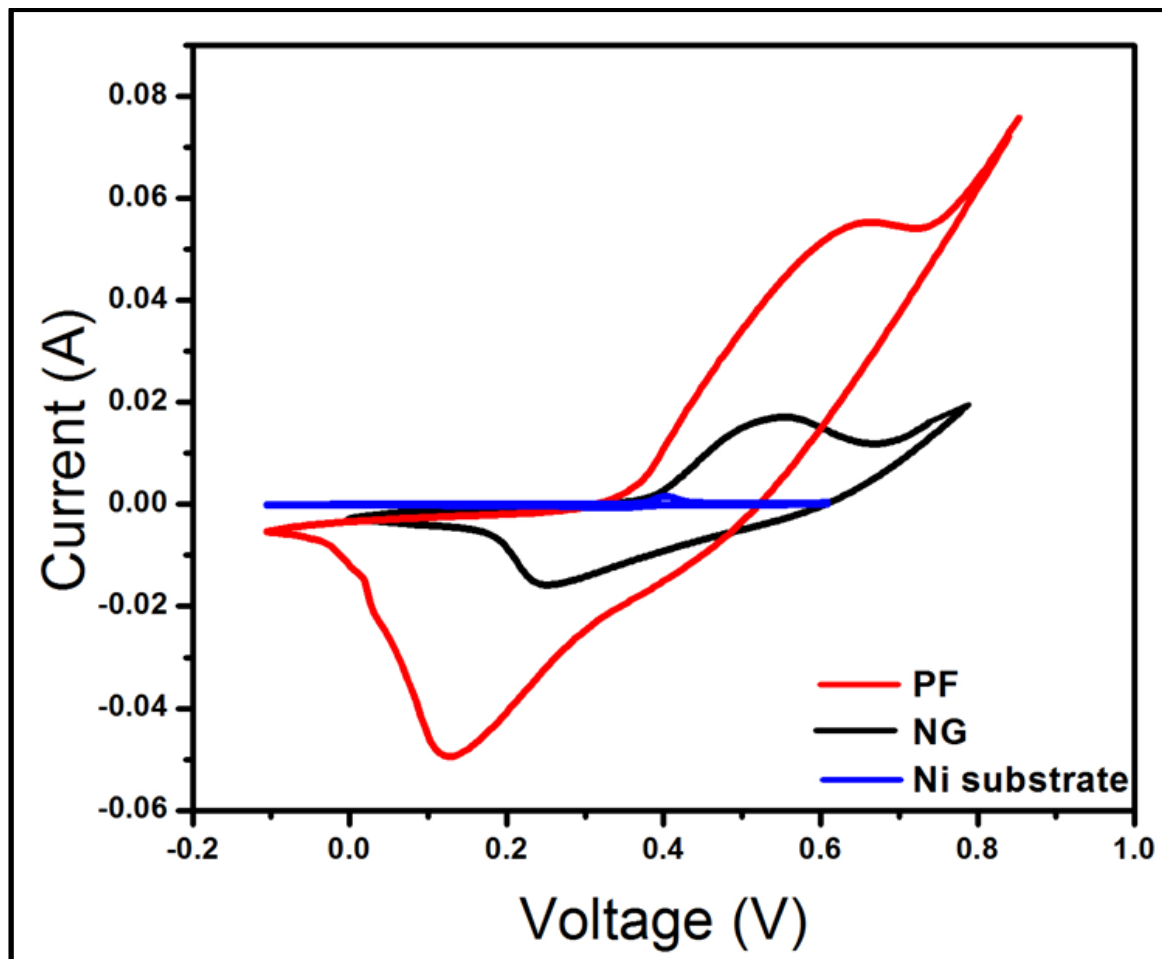

A comparison of the CV traces of PF, NG and the Ni substrate at a scan rate of 100 mV/s. It is obvious from the traces that the electrochemical activity of the substrate is negligible in comparison to that of the metal oxides.
